# Supplementary material
Source: Springer Nature journal article supplement (https://www.springermedizin.de/resource/supplementary/12872_2012_487_MOESM4_ESM.pdf/9430136)

## Carotis

## Femorals

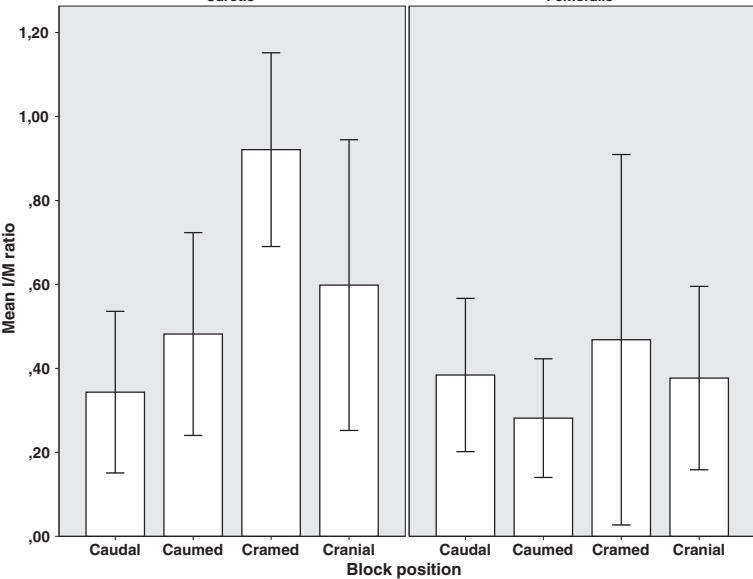

Supplement: MOESM4 [file 9430136]
